# Supplementary material for: The Infection of Paracalanid Copepods by the Alveolate Parasite Ellobiopsis chattoni Caullery, 1910 in a Subtropical Coastal Area
Source: MDPI journal article supplement (doi:10.3390/jmse10121816), 2022-11-25
Supplement: s1 [file s1]

Supplementary material

**Table S1:** Zooplankton sampling dates from 2009 to 2011. Aliquot size analysed to estimate parasitized copepod abundances, date and time of sampling, tidal period and copepod taxa infected by *Ellobiopsis chattoni* are provided. \* indicates sampling performed at the protected station (B); -: absence of infected copepods.

| Season      | Aliquot size | Date   | Time (h) | Tide | Infected taxa                                                               |
|-------------|--------------|--------|----------|------|-----------------------------------------------------------------------------|
| Summer 2009 | 1/8          | 01/24  | 10:00    | Low  | -                                                                           |
|             | 1/10         | 01/26* | 10:20    | Low  | <i>P. crassirostris</i> , <i>Paracalanus</i> spp., <i>O. hebes</i>          |
|             | 1/4          | 01/29  | 11:00    | Low  | -                                                                           |
|             | 1/4          | 01/30  | 13:15    | Low  | -                                                                           |
|             | 1/2          | 07/16  | 10:40    | High | <i>A. lilljeborgii</i>                                                      |
| Winter 2009 | 1/4          | 07/18* | 09:15    | Low  | <i>D. oculata</i> , <i>P. crassirostris</i> , <i>Paracalanus</i> spp.,      |
|             | 1/4          | 07/22  | 15:30    | Low  | <i>P. crassirostris</i> , <i>Paracalanus</i> spp.,                          |
|             | 1/8          | 07/24  | 10:30    | High | -                                                                           |
|             | 1/5          | 07/26  | 09:30    | High | <i>P. crassirostris</i> , <i>Paracalanus</i> spp., <i>O. hebes</i>          |
|             | 1/8          | 01/12  | 09:10    | Low  | <i>A. lilljeborgii</i>                                                      |
| Summer 2010 | 1/4          | 01/14  | 09:20    | Low  | -                                                                           |
|             | 1/4          | 01/24  | 09:00    | High | -                                                                           |
|             | 1/2          | 07/21  | 08:45    | Low  | <i>P. crassirostris</i> , <i>Paracalanus</i> spp.,                          |
| Winter 2010 | 1/4          | 07/23  | 08:50    | Low  | -                                                                           |
|             | 1            | 07/26  | 08:45    | High | <i>P. crassirostris</i> , <i>Paracalanus</i> spp.,                          |
|             | 1/8          | 07/28  | 08:40    | High | -                                                                           |
|             | 1/8          | 07/30  | 08:40    | High | <i>A. lilljeborgii</i> , <i>P. crassirostris</i> , <i>Paracalanus</i> spp., |
|             | 1/4          | 08/01  | 08:15    | High | -                                                                           |
|             | 1/2          | 01/17  | 08:45    | High | <i>A. lilljeborgii</i> , <i>O. hebes</i>                                    |
| Summer 2011 | 1/4          | 01/19  | 08:30    | High | <i>O. hebes</i>                                                             |
|             | 1/4          | 01/21  | 08:40    | High | -                                                                           |
|             | 1/2          | 01/24  | 08:45    | High | <i>P. crassirostris</i> , <i>Paracalanus</i> spp.,                          |
|             |              |        |          |      |                                                                             |

**Table S2:** Pelagic copepod species found off Ubatuba, SE Brazil during 2009-2011. \*: host species for *Ellobiopsis chattoni*.

| Taxa                                              | Taxa                                                  |
|---------------------------------------------------|-------------------------------------------------------|
| <b>Calanidae</b> (Dana, 1849)                     | <b>Acartidae</b> Sars, 1903                           |
| <i>Calanoides carinatus</i> (Kröyer, 1849)        | <i>Acartia lilljeborgii</i> Giesbrecht, 1889*         |
| <i>Nannocalanus minor</i> (Claus, 1863)           | <i>A. tonsa</i> Dana, 1849                            |
| <i>Undinula vulgaris</i> (Dana, 1849)             | <b>Oithonidae</b> Dana, 1853                          |
| <i>Neocalanus</i> sp Sars, 1925                   | <i>Dioithona oculata</i> (Farran, 1913)*              |
| <b>Paracalanidae</b> Giesbrecht, 1892             | <i>Oithona hebes</i> (Giesbrecht, 1891)*              |
| <i>Acrocalanus</i> sp Giesbrecht, 1888            | <i>O. nana</i> Giesbrecht, 1892                       |
| <i>Calocalanus pavo</i> (Dana, 1848)              | <i>Oithona plumifera</i> Baird, 1843*                 |
| <i>C. pavoninus</i> Farran, 1936                  | <i>O. simplex</i> (Farran, 1913)                      |
| <i>Calocalanus</i> sp Giesbrecht, 1888            | <b>Oncaeidae</b> Giesbrecht, 1893                     |
| <i>Paracalanus aculeatus</i> Giesbrecht, 1888*    | <i>O. mediterranea</i> (Claus, 1863)                  |
| <i>P. indicus</i> Wolfenden, 1905                 | <i>O. curta</i> Sars, 1916                            |
| <i>P. nanus</i> Sars, 1925                        | <i>Oncaea venusta</i> Philippi, 1843                  |
| <i>P. quasimodo</i> Bowman, 1971*                 | <i>Monothula subtilis</i> (Giesbrecht, 1891)          |
| <i>Paracalanus</i> sp. Boeck, 1865*               | <i>Triconia conifera</i> (Giesbrecht, 1891)           |
| <i>Parvocalanus crassirostris</i> Andronov, 1970* | <b>Sapphirinidae</b> Thorell, 1859                    |
| <b>Mecynoceridae</b> Thompson, 1888               | <i>Sapphirina nigromaculata</i> Claus, 1863           |
| <i>Mecynocera clausii</i> Thompson, 1888          | <i>Sapphirina</i> sp Thompson, 1829                   |
| <b>Eucalanidae</b> Giesbrecht, 1892               | <i>Copilia mirabilis</i> Dana, 1849                   |
| <i>Subeucalanus pileatus</i> (Giesbrecht, 1888)   | <b>Corycaeidae</b> (Dana, 1852)                       |
| <i>S. crassus</i> (Giesbrecht, 1888)              | <i>Corycaeus speciosus</i> (Dana, 1842)               |
| <b>Clausocalanidae</b> Giesbrecht, 1892           | <i>Ditrichocorycaeus amazonicus</i> (F. Dahl, 1894)   |
| <i>Clausocalanus furcatus</i> (Brady, 1883)       | <i>Farranula gracilis</i> (Dana, 1853)                |
| <i>Ctenocalanus</i> sp (Giesbrecht, 1888)         | <i>Onychocorycaeus giesbrechti</i> (F. Dahl, 1894)    |
| <i>C. cf heronae</i> Vega-Perez & Bowman, 1992    | <b>Clausidiidae</b> Emblenton, 1901                   |
| <b>Euchaetidae</b> Giesbrecht, 1892               | <i>Hemicyclops thalassius</i> Vervoot & Ramirez, 1966 |
| <i>Euchaeta marina</i> (Prestandrea, 1883)        | <i>Saphirella</i> spp. T. Scott, 1894                 |
| <b>Scolecitrichidae</b> Giesbrecht, 1892          | <b>Ectinosomatidae</b> Oloffson, 1917                 |
| <i>Scolecithix</i> sp Brady, 1883                 | <i>Microsetella novergica</i> (Dana, 1847)            |
| <b>Metridinidae</b> Sars, 1902                    | <i>M. rosea</i> (Dana, 1847)                          |
| <i>Pleurommama</i> sp Giesbrecht & Schmeil, 1898  | <b>Miraciidae</b> Dana, 1846                          |
| <b>Centropagidae</b> Giesbrecht, 1892             | <i>Macrosetella gracilis</i> (Dana, 1848)             |
| <i>Centropages velificatus</i> de Oliveira, 1946  | <b>Euterpinae</b> Brian, 1921                         |
| <b>Pseudodiaptomidae</b> Sars, 1902               | <i>Euterpina acutifrons</i> (Dana, 1852)              |
| <i>Pseudodiaptomus acutus</i> (F. Dahl, 1894)     | <b>Clytemnestridae</b> Scott, 1909                    |
| <b>Temoridae</b> (Giesbrecht, 1849)               | <i>Clytemnestra scutellata</i> Dana, 1848             |
| <i>Temora stylifera</i> (Dana, 1849)              | <b>Longipediidae</b> Sars, 1903                       |
| <i>T. turbinata</i> (Dana, 1849)                  | <i>Longipedia americana</i> Wells, 1980               |
| <b>Candaciidae</b> Giesbrecht, 1892               | <b>Monstriloida</b>                                   |
| <i>Candacia</i> sp Dana, 1846                     | <i>Monstrilla</i> sp Dana, 1849                       |
| <b>Pontellidae</b> Dana, 1853                     | <i>Cymbasoma</i> sp Thompson, 1888                    |
| <i>Labidocera acutifrons</i> (Dana, 1849)         |                                                       |
| <i>L. fluviatilis</i> F. Dahl, 1894               |                                                       |
| <i>Calanopia americana</i> F. Dahl, 1894          |                                                       |
| <i>Pontellopsis brevis</i> (Giesbrecht, 1889)     |                                                       |
